RESEARCH ARTICLE

# Direct Determination of Phosphatase Activity from Physiological Substrates in Cells

Zhongyuan Ren<sup>1,2,3,4,5,6,7</sup>, Le Duy Do<sup>1,2,3,4,5,6,8</sup>, Géraldine Bechkoff<sup>1,2,3,4,5,6</sup>, Saida Mebarek<sup>1,2,3,4,5,6</sup>, Nermin Keloglu<sup>1,2,3,4,5,6</sup>, Saandia Ahamada<sup>1,2,3,4,5,6</sup>, Saurabh Meena<sup>1,2,3,4,5,6</sup>, David Magne<sup>1,2,3,4,5,6</sup>, Slawomir Pikula<sup>8</sup>, Yuqing Wu<sup>7</sup>, René Buchet<sup>1,2,3,4,5,6\*</sup>

**1** Université de Lyon, Villeurbanne, France, **2** Université Lyon 1, Villeurbanne, France, **3** INSA-Lyon, Villeurbanne, France, **4** CPE Lyon, Villeurbanne, France, **5** Institut de Chimie et Biochimie Moléculaires et Supramoléculaires, Villeurbanne, France, **6** CNRS UMR 5246, Villeurbanne, France, **7** State Key Laboratory of Supramolecular Structure and Materials, Jilin University Changchun, 130012, China, **8** Department of Biochemistry, Nencki Institute of Experimental Biology and Polish Academy of Sciences, 02–093 Warsaw, Poland

\* [rbuchet@univ-lyon1.fr](mailto:rbuchet@univ-lyon1.fr)

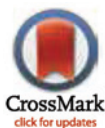

OPEN ACCESS

**Citation:** Ren Z, Do LD, Bechkoff G, Mebarek S, Keloglu N, Ahamada S, et al. (2015) Direct Determination of Phosphatase Activity from Physiological Substrates in Cells. PLoS ONE 10(3): e0120087. doi:10.1371/journal.pone.0120087

**Academic Editor:** Elena Aikawa, Brigham and Women's Hospital, Harvard Medical School, UNITED STATES

**Received:** September 26, 2014

**Accepted:** January 19, 2015

**Published:** March 18, 2015

**Copyright:** © 2015 Ren et al. This is an open access article distributed under the terms of the [Creative Commons Attribution License](https://creativecommons.org/licenses/by/4.0/), which permits unrestricted use, distribution, and reproduction in any medium, provided the original author and source are credited.

**Data Availability Statement:** All relevant data are within the paper.

**Funding:** Mr. Zhongyuan Ren received a PhD scholarship from the China Scholarship Council <http://en.csc.edu.cn>. Mr. Le Duy Do is a recipient of the fellowship from the International PhD program in Neurobiology (project No 06 - collaborative PhD project between the Nencki Institute of Experimental Biology and Université Lyon 1) <http://neurophd.nencki.gov.pl>. This research was supported by the following: the French Agency for the promotion of higher education and international mobility (Campus

## Abstract

A direct and continuous approach to determine simultaneously protein and phosphate concentrations in cells and kinetics of phosphate release from physiological substrates by cells without any labeling has been developed. Among the enzymes having a phosphatase activity, tissue non-specific alkaline phosphatase (TNAP) performs indispensable, multiple functions in humans. It is expressed in numerous tissues with high levels detected in bones, liver and neurons. It is absolutely required for bone mineralization and also necessary for neurotransmitter synthesis. We provided the proof of concept that infrared spectroscopy is a reliable assay to determine a phosphatase activity in the osteoblasts. For the first time, an overall specific phosphatase activity in cells was determined in a single step by measuring simultaneously protein and substrate concentrations. We found specific activities in osteoblast like cells amounting to  $116 \pm 13 \text{ nmol min}^{-1} \text{ mg}^{-1}$  for PPI, to  $56 \pm 11 \text{ nmol min}^{-1} \text{ mg}^{-1}$  for AMP, to  $79 \pm 23 \text{ nmol min}^{-1} \text{ mg}^{-1}$  for beta-glycerophosphate and to  $73 \pm 15 \text{ nmol min}^{-1} \text{ mg}^{-1}$  for 1-alpha-D glucose phosphate. The assay was also effective to monitor phosphatase activity in primary osteoblasts and in matrix vesicles. The use of levamisole – a TNAP inhibitor – served to demonstrate that a part of the phosphatase activity originated from this enzyme. An  $\text{IC}_{50}$  value of  $1.16 \pm 0.03 \text{ mM}$  was obtained for the inhibition of phosphatase activity of levamisole in osteoblast like cells. The infrared assay could be extended to determine any type of phosphatase activity in other cells. It may serve as a metabolomic tool to monitor an overall phosphatase activity including acid phosphatases or other related enzymes.

## Introduction

Among the enzymes having a phosphatase activity and releasing  $\text{P}_i$ , tissue non-specific alkaline phosphatase (TNAP) performs indispensable, multisystemic functions in humans [1]. It is

France) (Grant: Polonium N° 27727TA), <http://www.campusfrance.org/fr/>; CNRS International project of scientific cooperation (PICS) (Grant N° 5096) <http://www.cnrs.fr/derci/spip.php?article51>; Polish Ministry of Science and Higher Education (Grant N° N401 140639) <http://www.nauka.gov.pl/en/> and European Union Capacities Programme (Research potential) (Grant N° EU FP7 Project Bio-imaging in research Innovation and education, GA No. 264173) <http://bioimagine.nencki.gov.pl/en/?p=glowna&lng=en>. The funders had no role in study design, data collection and analysis, decision to publish, or preparation of the manuscript.

**Competing Interests:** The authors have declared that no competing interests exist.

expressed with high levels in bones, liver and neurons. It is absolutely required for bone mineralization and also necessary for neurotransmitter synthesis. So far there is no direct methodological approach to determine phosphate in the living cells without the need of labelling. Most standard methods for measuring inorganic phosphate or pyrophosphate are based on coupled enzyme assays, colorimetric methods, conductance, or radioactivity labeling which do not allow one-step determination in the cells. Protein determination and activity measurements must be performed separately. For example, the screening of TNAP inhibitors relied on the determination of the recombinant TNAP activity at alkaline pH using para-nitrophenylphosphate (pNPP), which is not a physiological substrate. A 1,000-fold more sensitive and 10-fold faster than the pNPP assay has been developed with pNPP dioxetane-based substrate [2–3]. However, TNAP inhibitors selected by using non physiological substrates may act differently on the living cells. Therefore, there is a strong demand for flexible and fast strategies to select inhibitors with improved prospects for clinical success [4]. Infrared (IR) spectroscopy [5] has been employed to identify specific finger-like signatures in microbial cells [6–10] in tumour cells [11–16] or in tissues [17–19] giving information of overall structural and biochemical cell composition or changes induced by anti-tumour drugs in cells [20–28]. Alkaline phosphatase activity in sera [29] has been determined by IR, suggesting the possibility of using IR for quantitative determination of an enzymatic activity in whole cells. Here, we report a continuous IR assay to determine phosphatase activity in osteoblasts and in matrix vesicles released by chondrocytes, characterized by high TNAP activity. We provided the proof of concept that infrared spectroscopy is a reliable assay to determine a phosphatase activity in the osteoblasts. For the first time, an overall specific phosphatase activity in a single step by measuring simultaneously protein and substrate concentrations was determined.

## Materials and Methods

### Isolation of matrix vesicles

Matrix vesicles (MVs) were prepared according to Wuthier's method [30]. Femurs from twenty 17-day-chicken embryos were taken. Slices (1–3 mm thick) of growth plates and epiphyseal cartilage were cut. They were washed five times in synthetic cartilage lymph (SCL) buffer containing 1.42 mM NaH<sub>2</sub>PO<sub>4</sub>·H<sub>2</sub>O, 1.83 mM NaHCO<sub>3</sub>, 12.7 mM KCl, 0.57 mM MgCl<sub>2</sub>, 5.55 mM D-glucose, 63.5 mM sucrose, 16.5 mM TES, 100 mM NaCl, 0.57 mM Na<sub>2</sub>SO<sub>4</sub>, pH 7.4. The slices were incubated at 37°C for 180 min by mixing continuously in SCL buffer containing 200–500 units g<sup>-1</sup> tissue of type I collagenase from *Clostridium histolyticum* (Sigma) and 1 mM CaCl<sub>2</sub>·H<sub>2</sub>O. Then, it was filtered through a nylon filter. The filtrate was centrifuged at 600 g for 15 min at 4°C. After the first centrifugation the debris were discarded and the supernatant was centrifuged at 20 000 g for 20 min at 4°C. A second centrifugation at 80 000g for 60 min at 4°C was then performed. The supernatant was discarded and the pellet was gently washed with 1 mL Tris HCL (100 mM, pH 8.0) containing 5 μM ZnCl<sub>2</sub> and 5 mM MgCl<sub>2</sub>. Washing medium was discarded and the intact pellet (around 0.05 mL) was suspended in 0–2 mL Tris HCL (100 mM, pH 8.0) containing 5 μM ZnCl<sub>2</sub> and 5 mM MgCl<sub>2</sub> (called throughout buffer A). The protein concentration in MVs was determined by Bradford [31] was in the range of 0.2 to 8 mg MV protein mL<sup>-1</sup>. MVs were freshly prepared for the IR measurements.

### Saos-2 Cells

Human osteosarcoma Saos-2 cells (ATCC HTB-85) were cultured in DMEM medium supplemented with 100 U mL<sup>-1</sup> penicillin, 100 g mL<sup>-1</sup> streptomycin (both from Sigma) and 10% FBS (v:v, Gibco). Stimulation of Saos-2 cells was induced by culturing the confluent cells in growth medium supplemented with 50 μg mL<sup>-1</sup> ascorbic acid (AA) (Sigma) and 7.5 mM β-

glycerophosphate (Sigma). After a six-day incubation, Saos-2 cells were detached with trypsin (Sigma) and 1 mM  $\text{CaCl}_2 \cdot \text{H}_2\text{O}$ . The cells were washed with 1 mL buffer A. After centrifugation, the supernatant was discarded. The washing and centrifugation procedures were repeated three times so that the DMEM buffer and trypsin were completely removed. An aliquot of 0.5 to 1.5 mg of freshly prepared Saos-2 cells as determined by weighting was taken and kept in Eppendorf tubes for the IR measurements. The cells were freshly prepared for IR measurements.

### Primary cell cultures from mice

All experiments were carried out according to the guidelines laid down by the French Ministère de l'Agriculture (n° 87–848) and the E.U. Council Directive for the Care and Use of Laboratory Animals of November 24th, 1986 (86/609/EEC). Animal experiments were performed under the authorization n°69–266–0501 (INSA-Lyon, DDPP-SV, Direction Départementale de la Protection des Populations—Services Vétérinaires du Rhône), according to the guidelines laid down by the French Ministère de l'Agriculture (n° 87–848) and the E.U. Council Directive for the Care and Use of Laboratory Animals of November 24th, 1986 (86/609/EEC). MLC (n°692661241), AG (n°69266332) and COS (n°69266257) hold special licenses to experiment on living vertebrates issued by the French Ministry of Agriculture and Veterinary Service Department. The experiments were realized on euthanized animals by dislocation of cervical vertebra, which didn't require surgery and were not painful. This study was specifically approved by the Committee on the Ethics of Animal Experiments of the INSA of Lyon CETIL (permit Number: 012012). The preparation of primary cells were performed at INSA of Lyon, IMBL Building, 69100 Villeurbanne, France. Primary osteoblast cells were enzymatically isolated from calvaria (frontal and parietal bones) of 5–6 days old mice (C57BL/6J strain). Calvaria were dissected aseptically and cells were isolated using sequential digestion at 37°C with trypsin/EDTA 0.05% during 20 min and then with liberase 0.8 U mL<sup>-1</sup> during 20 min. The first two digests were discarded, and cells obtained after two 45 min digestions with liberase 0.8 U mL<sup>-1</sup> were collected, pooled and then filtered through a 100 μm cell strainer. The cells were plated at a density of  $1 \times 10^5$  cells per well in 22.1 mm culture dish in DMEM containing 15% FBS (v:v, Gibco), 100 U mL<sup>-1</sup> penicillin and 100 μg mL<sup>-1</sup> streptomycin (both from Sigma) and switched 24h later to growth medium i.e., DMEM containing 10% FBS (v:v, Gibco), supplemented with 50 μg mL<sup>-1</sup> ascorbic acid (Sigma). After six days of culture, the medium was further supplemented with 7.5 mM β-glycerophosphate (Sigma) and 50 μg mL<sup>-1</sup> ascorbic acid during one week. Primary cultures were used without passage. Cultures were maintained in a humidified atmosphere consisting of 95% air/5% CO<sub>2</sub> at 37°C. After a six-day incubation, primary cells were detached with trypsin (Sigma) and 1 mM  $\text{CaCl}_2 \cdot \text{H}_2\text{O}$ . The cells were washed with 1 mL buffer A or with 1 mL DMEM buffer. After centrifugation, the supernatant was discarded. The washing and centrifugation procedures were repeated three times so that trypsin was completely removed. An aliquot of 0.5 to 1.5 mg of freshly prepared osteoblasts as determined by weighting was taken and kept in Eppendorf tubes for the IR measurements. The cells were freshly prepared for IR measurements.

### Infrared spectra

To start the reaction, an aliquot of either MV (0.5 to 8 mg protein mL<sup>-1</sup>), Saos-2 cells (6 to 28 mg protein mL<sup>-1</sup>) or primary osteoblast (20 to 45 mg protein mL<sup>-1</sup>) was taken and mixed with the reaction medium containing 40–80 mM final PP<sub>i</sub> or one of other substrates (AMP, ADP, ATP, UTP, α-D-glucose 1-phosphate (G-1P), β-glycerophosphate (β-GP) and paranitrophenylphosphate (pNPP)) in buffer A. Final protein concentrations in MVs or in cells

were determined directly by measuring the intensity of the amide-II band at  $1550\text{-cm}^{-1}$  with the concentration absorption coefficient  $\epsilon = 3.6\text{ mg}^{-1}\text{mL cm}^{-1}$ .  $\epsilon$  was determined by using bovine serum albumin as a protein. Five  $\mu\text{L}$  of the reaction mixture containing either MVs or Saos-2 cells or primary osteoblast cells were taken and deposited between two  $\text{BaF}_2$  windows of a demountable thermostated cell (model Harrick) separated with a  $12\text{ }\mu\text{m}$  (for IR spectra of substrates) or  $6\text{ }\mu\text{m}$  (for IR spectra of cells with substrates) Teflon spacer. IR data were acquired with a Thermo Scientific Nicolet iS10 spectrometer equipped with a DTGS detector. The IR spectra were recorded with a thermostated IR cell kept at  $37^\circ\text{C}$  with 128 interferograms at  $4\text{ cm}^{-1}$  resolution each and then Fourier transformed. During data acquisition, the spectrometer was continuously purged with dry filtered air (Balston regenerating desiccant dryer, model 75–45 12 VDC). At least three independent measurements have been performed to obtain the kinetics parameters. To minimize cell to cell variation, affecting TNAP activity, the same cell preparations were used to compare with the controls. For the determination of  $\text{IC}_{50}$  of levamisole, relative activities were measured to take into account of the cell to cell variations.

## Results and Discussion

### IR spectra of phosphatase substrates

IR spectra of phosphatase substrates such as AMP, ADP, ATP, UTP,  $\alpha$ -D-glucose 1-phosphate (G-1P),  $\beta$ -glycerophosphate ( $\beta$ -GP), *p*NPP and  $\text{PP}_i$  in aqueous Tris-HCl buffer (pH 8) containing  $5\text{ mM MgCl}_2$  and  $5\text{ }\mu\text{M ZnCl}_2$  (buffer A) present sufficient differences in band shapes and positions as compared with the IR spectrum of phosphate (Fig. 1) to be used for analytical application.

The IR spectrum of  $\text{P}_i$  in buffer A revealed two bands at  $1076$  and  $990\text{ cm}^{-1}$  (Fig. 1) that are assigned respectively to asymmetric and symmetric stretching vibrations of O-P-O, respectively [32]. The position of the phosphate bands is sensitive to their ionic environment as in the case of nucleotides [33] or phospholipids [34,35]. To illustrate the potential of the IR assay in assessing phosphatase activity in cells, we measured IR spectrum immediately (with 3 min delay) after mixing  $50\text{ mM}$  substrate with osteoblast-like Saos-2 cells, (Fig. 2, dashed lines) and after 30 min of incubation (Fig. 2, full lines).

In all cases (with AMP, ADP, ATP, UTP, G-1P,  $\beta$ -GP), *p*NPP or  $\text{PP}_i$ ), the intensity of one or both  $\text{P}_i$  bands at  $1076$ – $1080$  and  $990\text{ cm}^{-1}$  increased, indicating the phosphatase activity in the whole cells (Fig. 2). It was clearly observed in the successive difference spectra (spectrum measured at the indicated time minus that measured immediately after mixing  $50\text{ mM}$  substrate with Saos-2 cells) (Fig. 3).

Negative peaks indicated the disappearance of the substrate while positive peaks at  $1076$ – $1080$  and  $990\text{ cm}^{-1}$  illustrated the formation of  $\text{P}_i$  (Fig. 3). Hydrolysis of ATP, UTP and ADP in the Saos-2 cells produced  $\text{P}_i$  (positive  $1088$ – $1080\text{-cm}^{-1}$  and  $990\text{-cm}^{-1}$  bands) and AMP (positive  $977\text{-cm}^{-1}$  band) (Fig. 3). In the case of AMP hydrolysis, the  $\text{P}_i$  bands (located  $1088$ – $1080\text{ cm}^{-1}$  and  $990\text{ cm}^{-1}$ ) overlapped with the AMP bands (located at  $1088\text{ cm}^{-1}$  and  $977\text{ cm}^{-1}$ ) rendering difficult to observe the  $\text{P}_i$  bands. We also observed hydrolysis of G-1P,  $\beta$ -GP and *p*NPP and  $\text{PP}_i$  in Saos-2 cells indicating a broad phosphatase activity. Buffer A has the disadvantage of inducing cell aggregation after several hour incubation but its absorption in the  $1200$ – $1000\text{-cm}^{-1}$  region (Fig. 4a, dashed line) is lower than that of DMEM cellular medium (Fig. 4a, full line).

The feasibility to monitor the hydrolysis of  $\text{PP}_i$  by Saos-2 cells in DMEM was verified. Typical IR spectra of  $50\text{ mM}$   $\text{PP}_i$  with Saos-2 cells in buffer A (Fig. 4b) or in DMEM (Fig. 4c) immediately after mixing  $\text{PP}_i$  with Saos-2 cells (full trace) and after 30 min incubation (dashed trace) indicated both the decrease of the  $1100\text{-cm}^{-1}$  band of  $\text{PP}_i$  and the increase of the  $1076$ – $1080\text{-cm}^{-1}$  band of  $\text{P}_i$ , confirming the  $\text{PP}_i$  hydrolysis. Furthermore, the  $1550\text{-cm}^{-1}$  protein band

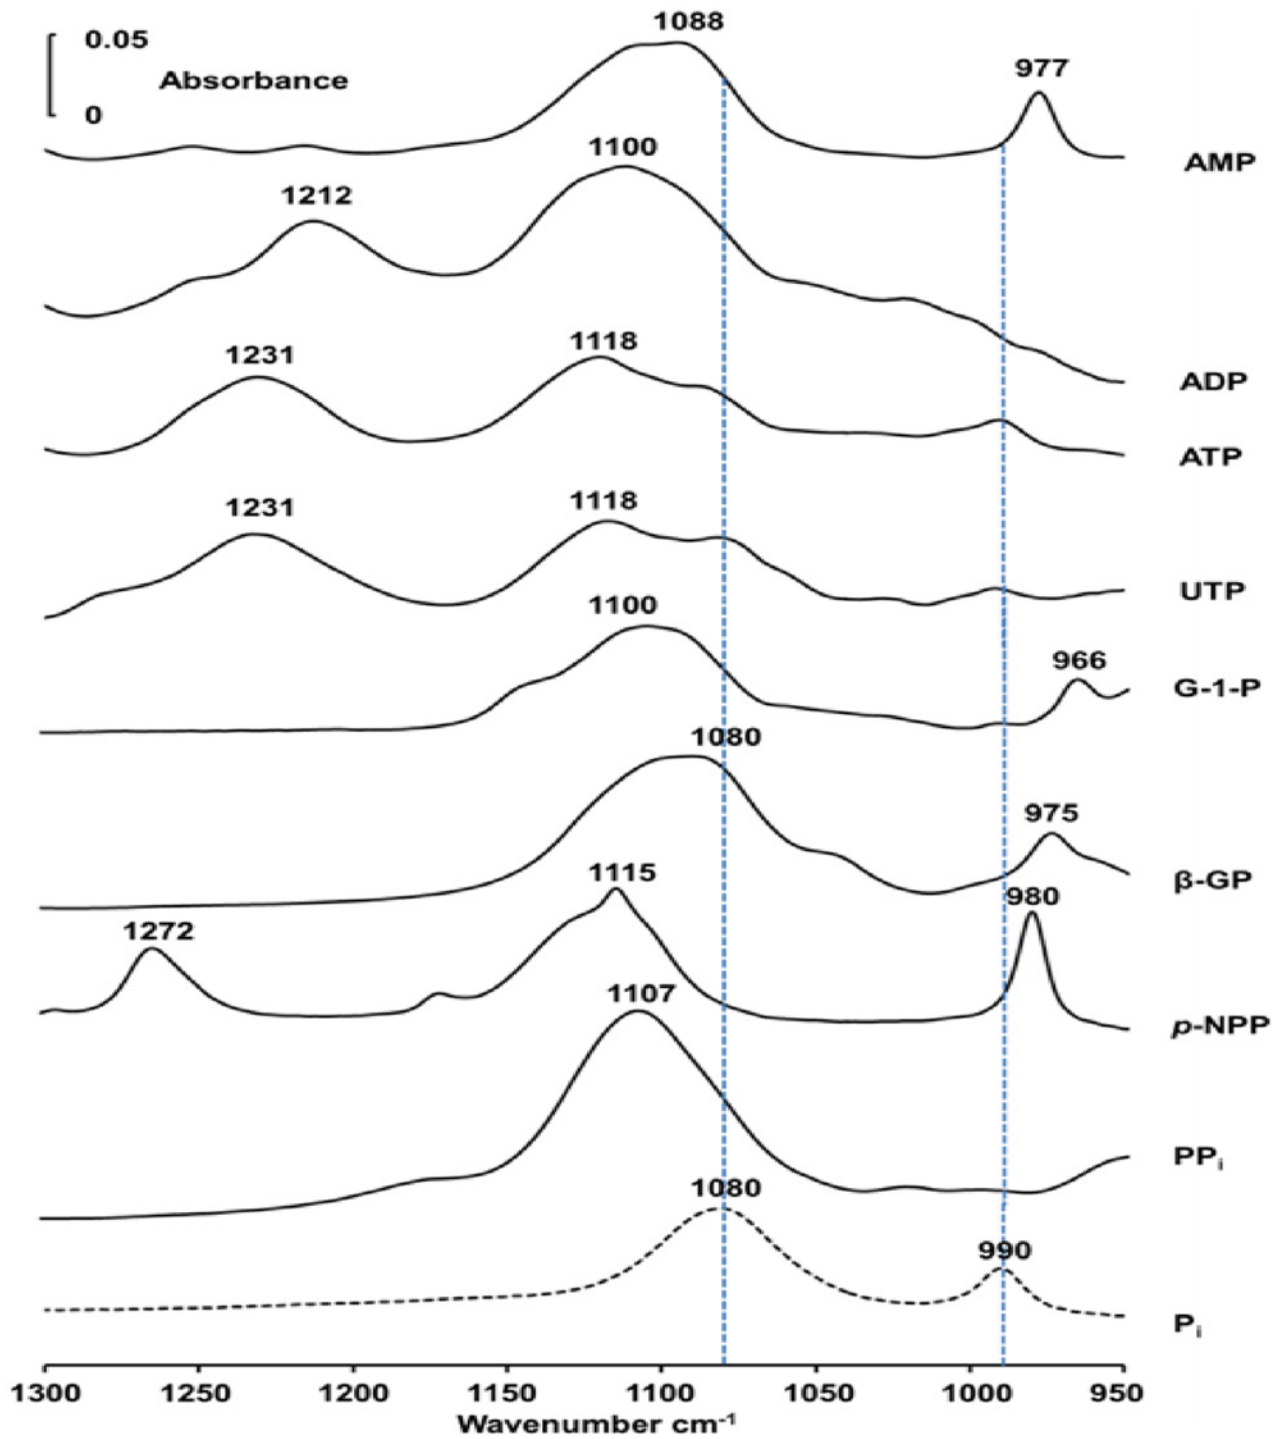

**Fig 1. Infrared spectra of substrates.** IR spectra of 50 mM phosphatase substrates: AMP, ADP, ATP, UTP, glucose-1-phosphate (G-1-P), β-glycerophosphate (β-GP), *p*-nitrophenylphosphate (*p*-NPP), PP<sub>i</sub> and P<sub>i</sub> in buffer A (100 mM Tris-HCl pH 8.0, 5 μM ZnCl<sub>2</sub> and 5 mM MgCl<sub>2</sub>) recorded at 37°C.

doi:10.1371/journal.pone.0120087.g001



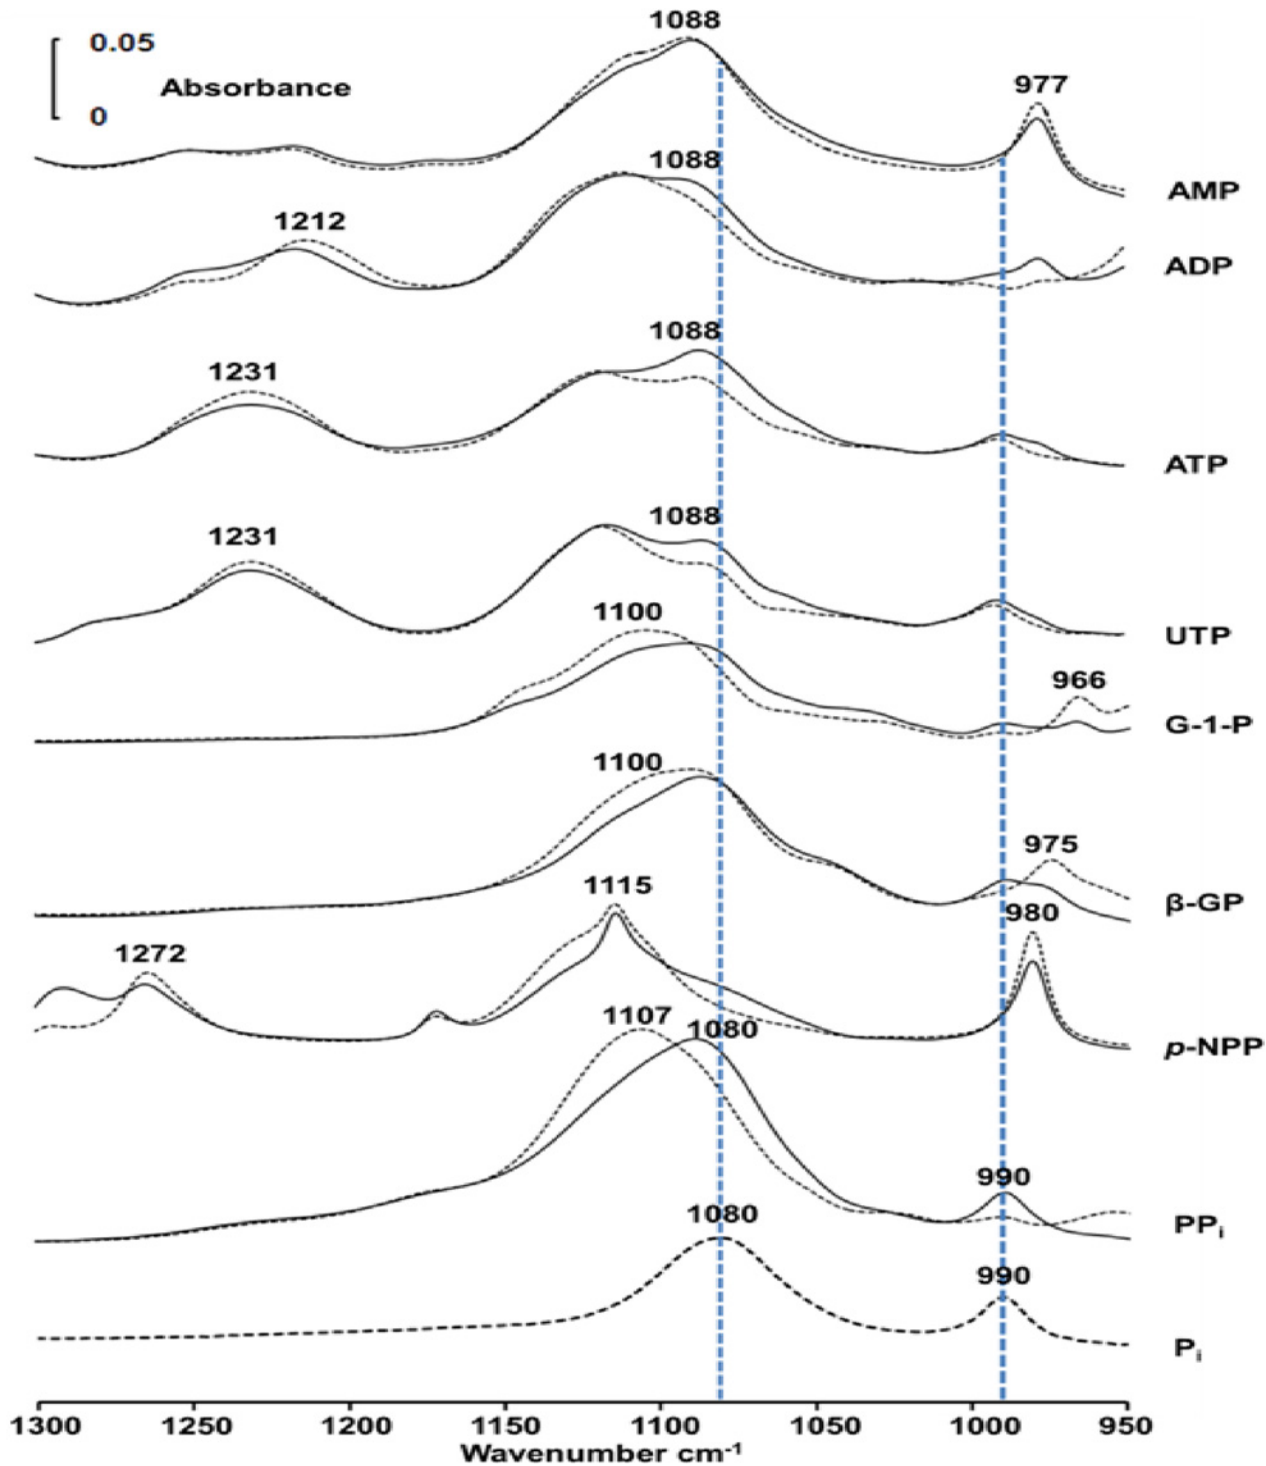

**Fig 2. Infrared spectra of hydrolyzed substrates in osteoblast-like cells.** IR spectra of 50 mM substrate (one among the substrates: AMP, ADP, ATP, UTP, G-1-P, β-GP, pNPP, PP<sub>i</sub> and P<sub>i</sub>) in buffer A containing Saos-2 cells (6–15 mg of Saos-2-cell protein mL<sup>-1</sup>), recorded immediately after mixing the substrate with cells (dashed lines) and after 30 min (full lines) at 37°C. The bottom trace shows the spectrum of 50 mM P<sub>i</sub> to indicate the positions of the two 1076–1080 and 990 cm<sup>-1</sup> bands.

doi:10.1371/journal.pone.0120087.g002

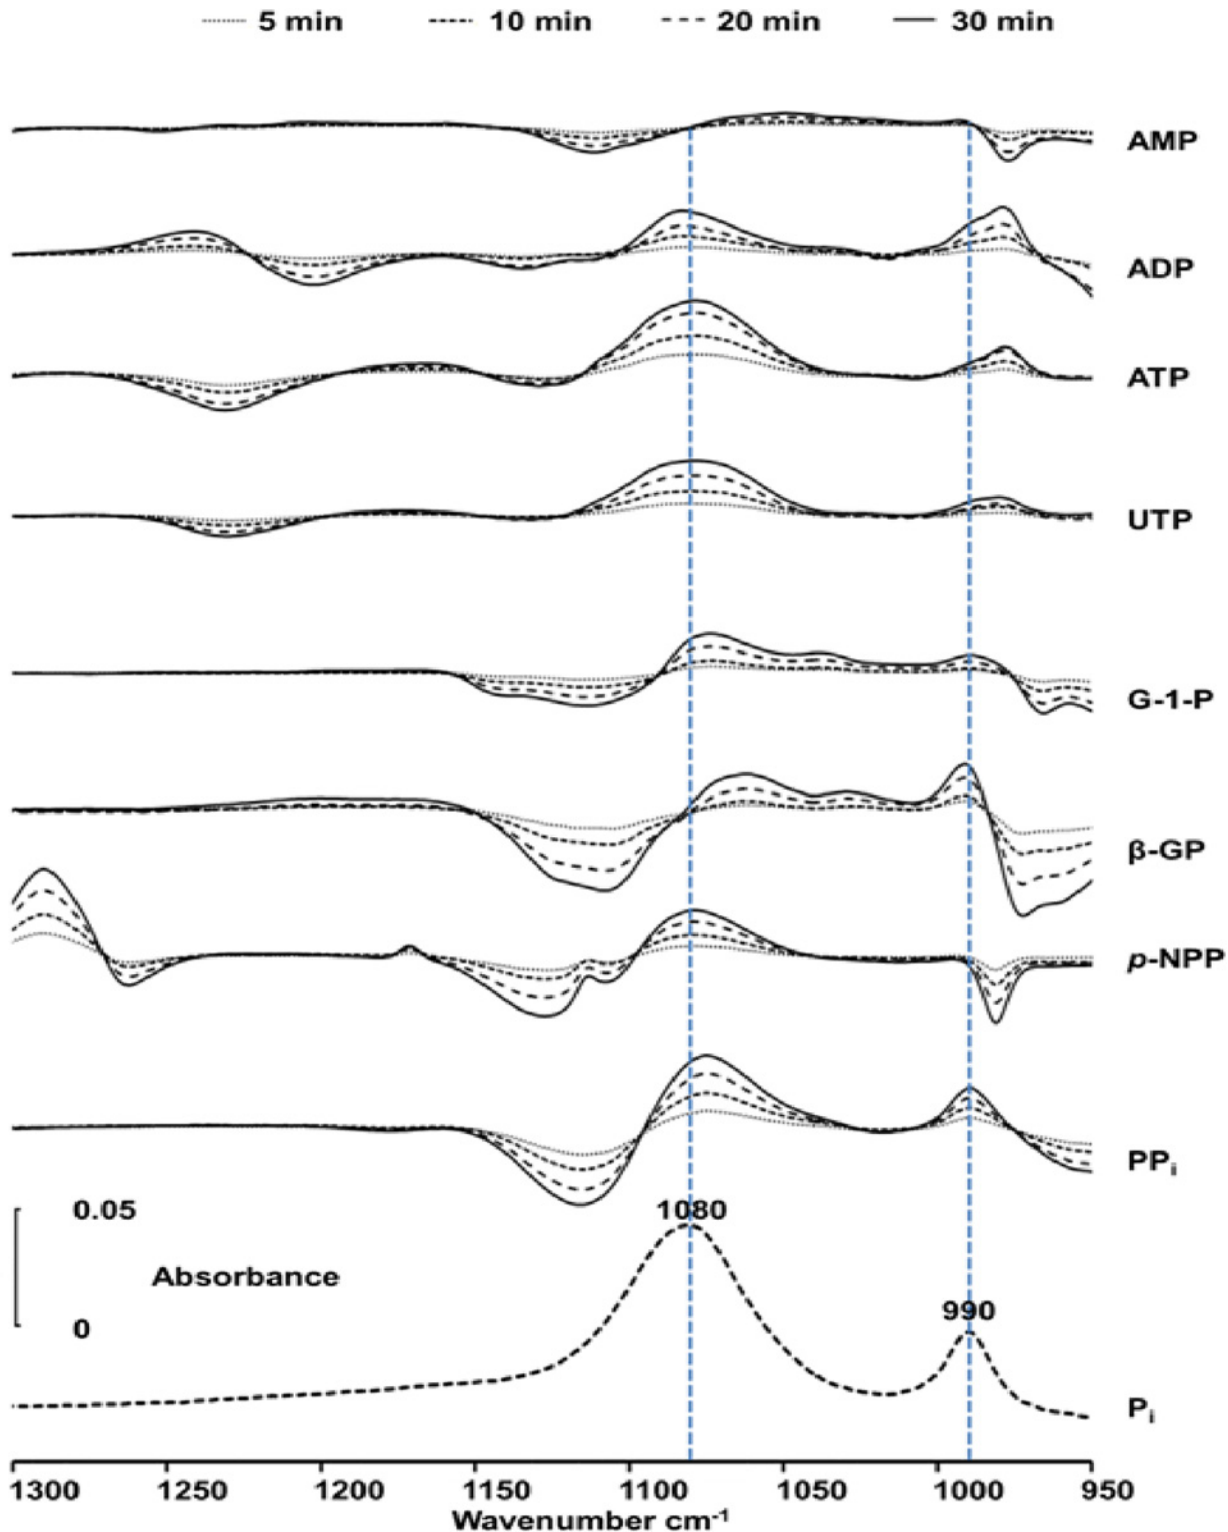

**Fig 3. Infrared difference spectra of hydrolyzed substrates in osteoblast-like cells.** Successive difference spectra of Saos-2 cells with 50 mM substrate (AMP, ADP, ATP, UTP, G-1-P,  $\beta$ -GP, pNPP and  $PP_i$ ) in buffer A (spectrum measured after a given time minus that measured immediately after mixing the substrate with cells) at 37°C determined at 5, 10, 20 and 30 min. The negative intensities indicated the decline of substrate concentration while the positive intensities of the 1076–1080 and the 990  $cm^{-1}$  bands indicated the appearance of  $P_i$ . The bottom trace shows the spectrum of 50 mM  $P_i$  to show the positions of the two 1076–1080 and 990  $cm^{-1}$  bands.

doi:10.1371/journal.pone.0120087.g003

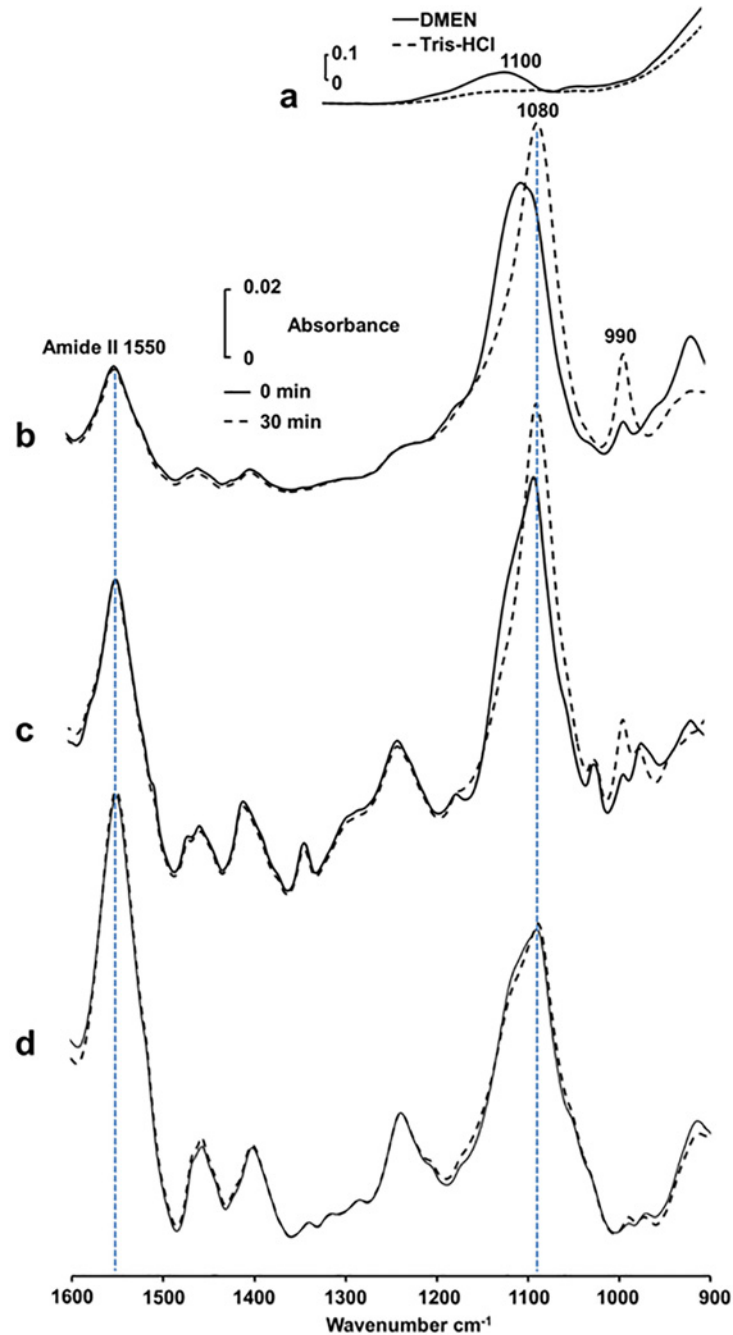

**Fig 4. Infrared spectra of  $PP_i$  during its hydrolysis in osteoblast-like cells and in primary cells.** (a) IR spectrum of buffer A and IR spectrum of DMEM. (b) IR spectra of Saos-2 cells ( $12 \text{ mg}$  of Saos-2-cell protein  $\text{mL}^{-1}$ ) with  $50 \text{ mM}$   $PP_i$  in buffer A recorded immediately after mixing the substrate with cells (dashed line) and after  $30 \text{ min}$  incubation at  $37^\circ\text{C}$  (full line). The spectrum of buffer A was deduced from the spectra of Saos-2 cells. (c) IR spectra of Saos-2 cells ( $28 \text{ mg}$  of Saos-2-cell protein  $\text{mL}^{-1}$  with  $50 \text{ mM}$   $PP_i$  in DMEM recorded immediately after mixing the substrate with cells (dashed line) and after  $30 \text{ min}$  incubation at  $37^\circ\text{C}$  (full line). The spectrum of DMEM was deduced from the spectra of Saos-2-cells. (d) IR spectra of primary osteoblast cells ( $45 \text{ mg}$  of cell protein  $\text{mL}^{-1}$ ) in buffer A with  $50 \text{ mM}$   $PP_i$  recorded immediately after mixing  $PP_i$  with cells (dashed line) and after  $30 \text{ min}$  incubation at  $37^\circ\text{C}$  (full line). The spectrum of buffer A was deduced from the spectra of osteoblasts.

doi:10.1371/journal.pone.0120087.g004



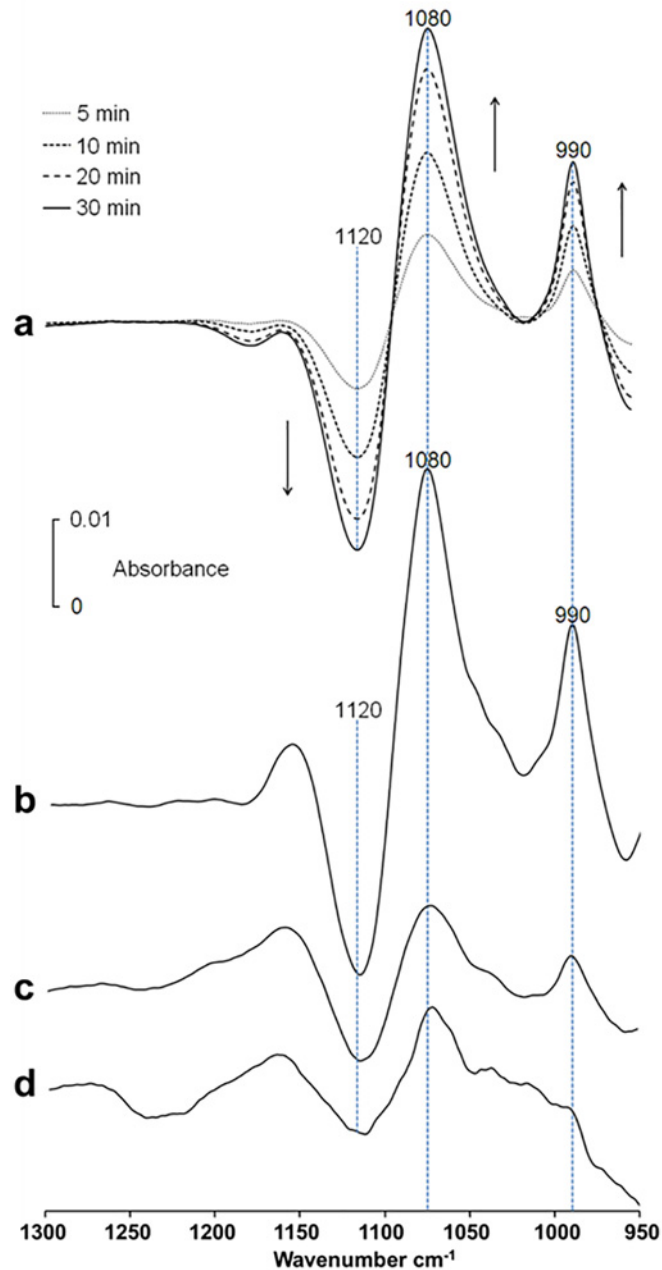

**Fig 5. Infrared difference spectra of  $PP_i$  during its hydrolysis in osteoblast-like cells and in primary cells.** (a) Successive IR difference spectra of Saos-2 cells ( $12 \text{ mg of Saos-2-cell protein mL}^{-1}$ ) in buffer A with  $50 \text{ mM } PP_i$  at  $37^\circ\text{C}$  from 5 min to 30 min (spectrum recorded after the indicated time minus spectrum recorded immediately after mixing substrate with cells). (b) IR difference spectrum of Saos-2 cells ( $28 \text{ mg of cell protein mL}^{-1}$ ) with  $50 \text{ mM } PP_i$  in DMEM medium at  $37^\circ\text{C}$  (spectrum recorded after 30 min minus spectrum recorded immediately after mixing substrate with cells). (c) IR difference spectrum of primary osteoblast cells ( $45 \text{ mg of cell protein mL}^{-1}$ ) with  $50 \text{ mM } PP_i$  in buffer A at  $37^\circ\text{C}$  (spectrum recorded after 30 min minus spectrum recorded immediately after mixing substrate with cells). (d) IR difference spectrum of primary osteoblast cells ( $220 \text{ mg of cell protein mL}^{-1}$ ) with  $50 \text{ mM } PP_i$  in DMEM at  $37^\circ\text{C}$ . (spectrum recorded after 30 min minus spectrum recorded immediately after mixing substrate with cells).

doi:10.1371/journal.pone.0120087.g005

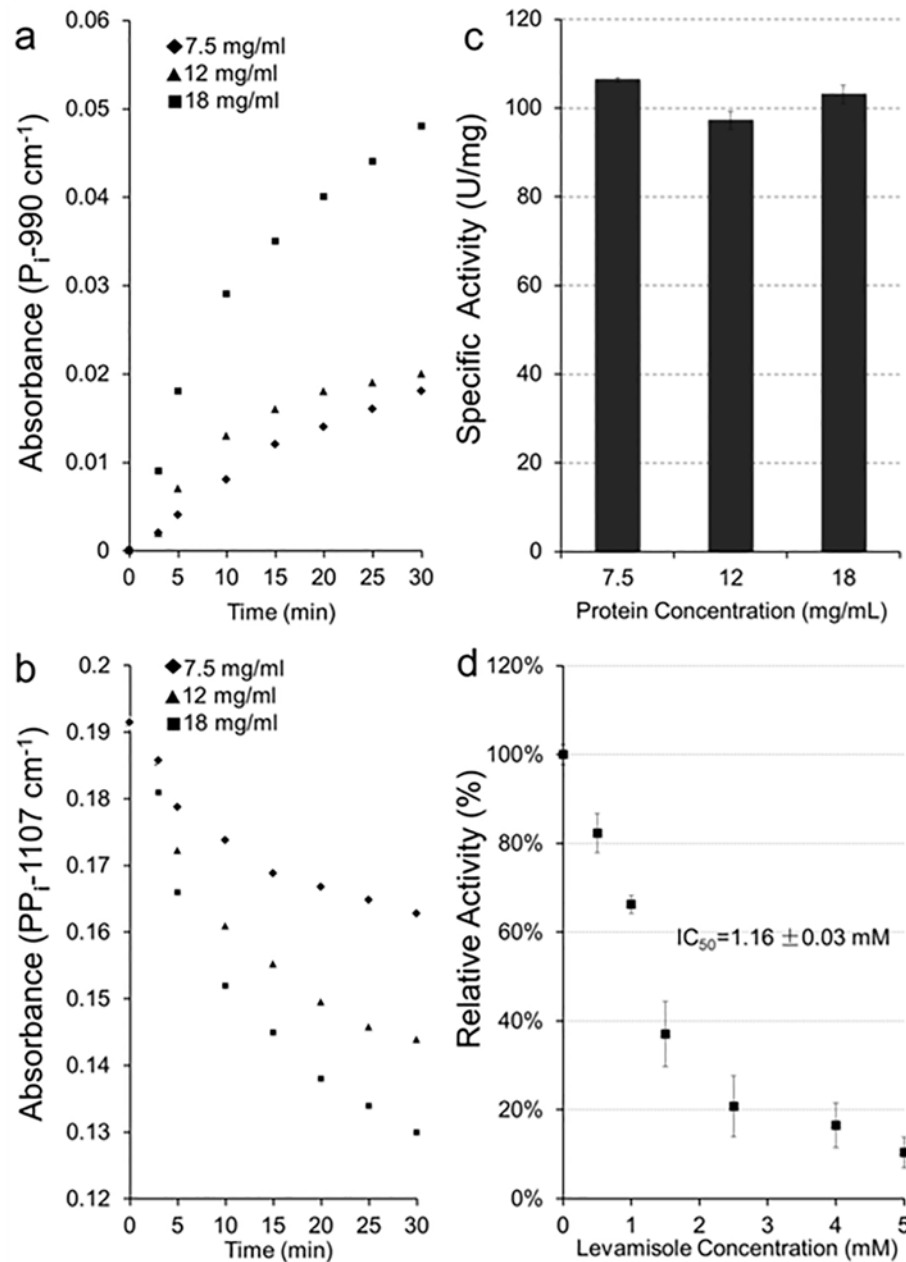

**Fig 6. Determinations of phosphatase activity in Saos-2 cells and IC<sub>50</sub> of levamisole.** (a) Absorption of PP<sub>i</sub>-band as a function of incubation time and of Saos-2 cell protein concentration (from 7.5 to 18 mg mL<sup>-1</sup>). (b) Absorption of PP<sub>i</sub> in 1120–1100-cm<sup>-1</sup> region as a function of incubation time and of Saos-2 cell protein concentration. (c) Specific activity of PP<sub>i</sub> hydrolysis by Saos-2 cells at three concentrations from 7.5, 12 and 18 mg mL<sup>-1</sup>. One enzyme unit (1 U) is expressed as 1 nmol hydrolyzed PP<sub>i</sub> per min at 37°C. As expected, the specific activity values determined as function of protein concentration in cells were not significantly different from each other. (d) Determination of IC<sub>50</sub> of levamisole by measuring inhibition of PP<sub>i</sub> hydrolysis by Saos-2 cells.

doi:10.1371/journal.pone.0120087.g006

allowed us to determine directly protein concentration using the concentration absorption coefficient  $\epsilon = 3.6 \text{ mg}^{-1} \text{ mL cm}^{-1}$ . Saos-2 osteoblast-like cells were selected due to their high TNAP activity, making it easier to monitor phosphatase activity. However they have different phenotypic properties in comparison with the corresponding healthy osteoblasts. Primary osteoblasts from mouse calvaria exhibited also  $\text{PP}_i$  hydrolysis both in buffer A (Fig. 4d) and in DMEM but it was much lower than that of Saos-2 cells. This was confirmed qualitatively by the magnitude of the difference in IR spectra (spectrum measured after 30 min minus that measured immediately after mixing  $\text{PP}_i$  with cells) recorded for Saos-2 cells in buffer A (Fig. 5a) and in DMEM medium (Fig. 5b) which were higher than that those of primary osteoblasts in buffer A (Fig. 5c) and in DMEM (Fig. 5d) respectively.

### Determination of specific activity of phosphatase in Saos-2 cells

The kinetic parameters are easily obtained from IR spectra. For example, the  $\text{PP}_i$  hydrolysis by Saos-2 cells is followed by an increase of the  $990\text{-cm}^{-1}$  band of  $\text{P}_i$  (Fig. 6a) and the concomitant decrease of the  $1120\text{--}1100\text{-cm}^{-1}$  band of  $\text{PP}_i$  (Fig. 6b).

The absorbance changes of  $1120\text{--}1100\text{-cm}^{-1}$  band of  $\text{PP}_i$  (Fig. 6b) and the  $990\text{-cm}^{-1}$  band of  $\text{P}_i$  (Fig. 6a) served to determine the  $\text{PP}_i$  hydrolysis (Table 1).

As expected, increasing the amount of Saos-2 cells, from  $7.5 \text{ mg mL}^{-1}$ ,  $12 \text{ mg mL}^{-1}$  to  $18 \text{ mg mL}^{-1}$ , as determined by the protein band, increased the  $\text{PP}_i$  hydrolysis but the specific activity remained at the level of  $102 \pm 4 \text{ nmol min}^{-1} \text{ mg}^{-1}$  as expected (Fig. 6c and Table 1). There is not a statistically significant difference between the specific activities (P value is at least greater than 0.513). This compares well with the specific  $\text{PP}_i$  hydrolysis of  $130 \text{ nmol min}^{-1} \text{ mg}^{-1}$  in mammalian HeLa cells at pH 8.5 (36) as assayed by the modified method of Fiske and Subbarow. Quantitative determinations were also obtained for AMP, G-1-P,  $\beta$ -GP,  $p\text{NPP}$  using both  $\text{P}_i$  bands at  $990$  and  $1076\text{--}1080 \text{ cm}^{-1}$  (Table 1). The substrate bands were also used to determine enzyme specific activity, as in the case of AMP ( $977 \text{ cm}^{-1}$ ),  $p\text{NPP}$  ( $980 \text{ cm}^{-1}$ ) and  $\text{PP}_i$  ( $1107 \text{ cm}^{-1}$ ) (Table 1). Specific activities determined either from  $\text{P}_i$  or from substrate-bands were identical within experimental errors except for G-1-P and  $\beta$ -GP due to strong band overlapping. To check

**Table 1. Specific activity of phosphatase activity of several substrates by osteoblast-like Saos-2 cells in buffer A at 37°C as determined by the infrared band of substrate or  $\text{P}_i$  ( $990$  and  $1070 \text{ cm}^{-1}$ ).**

| Substrates     | Band position $\text{cm}^{-1}$ (molecule) | Mol. Abs. coeff. $\text{L.mol}^{-1}.\text{cm}^{-1}$ | Specific activity $\text{nmol.mg}^{-1}.\text{min}^{-1}$ | Average $\text{nmol.mg}^{-1}.\text{min}^{-1}$ |
|----------------|-------------------------------------------|-----------------------------------------------------|---------------------------------------------------------|-----------------------------------------------|
| AMP            | 977 (AMP)                                 | $476 \pm 48$                                        | $66 \pm 4$                                              | $58 \pm 4^*$                                  |
|                | 990 ( $\text{P}_i$ )                      | $443 \pm 50$                                        | $42 \pm 7$                                              |                                               |
| G-1-P          | 990 ( $\text{P}_i$ )                      | $443 \pm 50$                                        | $119 \pm 22$                                            | $106 \pm 15$                                  |
|                | 1080 ( $\text{P}_i$ )                     | $1215 \pm 131$                                      | $92 \pm 12$                                             |                                               |
| $\beta$ -GP    | 990 ( $\text{P}_i$ )                      | $443 \pm 50$                                        | $97 \pm 2$                                              | $97 \pm 2$                                    |
| $p\text{-NPP}$ | 980 ( $p\text{-NPP}$ )                    | $1210 \pm 81$                                       | $108 \pm 3$                                             | $121 \pm 13$                                  |
|                | 1080 ( $\text{P}_i$ )                     | $1215 \pm 131$                                      | $135 \pm 4$                                             |                                               |
| $\text{PP}_i$  | 1107 ( $\text{PP}_i$ )                    | $2158 \pm 21$                                       | $116 \pm 22$                                            | $118 \pm 10$                                  |
|                | 990 ( $\text{P}_i$ )                      | $443 \pm 50$                                        | $127 \pm 12$                                            |                                               |
|                | 1080 ( $\text{P}_i$ )                     | $1215 \pm 131$                                      | $110 \pm 4$                                             |                                               |

(\* Specific activity of TNAP using AMP was significantly different from that of TNAP using  $\text{PP}_i$  ( $p = 0.0004$ ).

doi:10.1371/journal.pone.0120087.t001

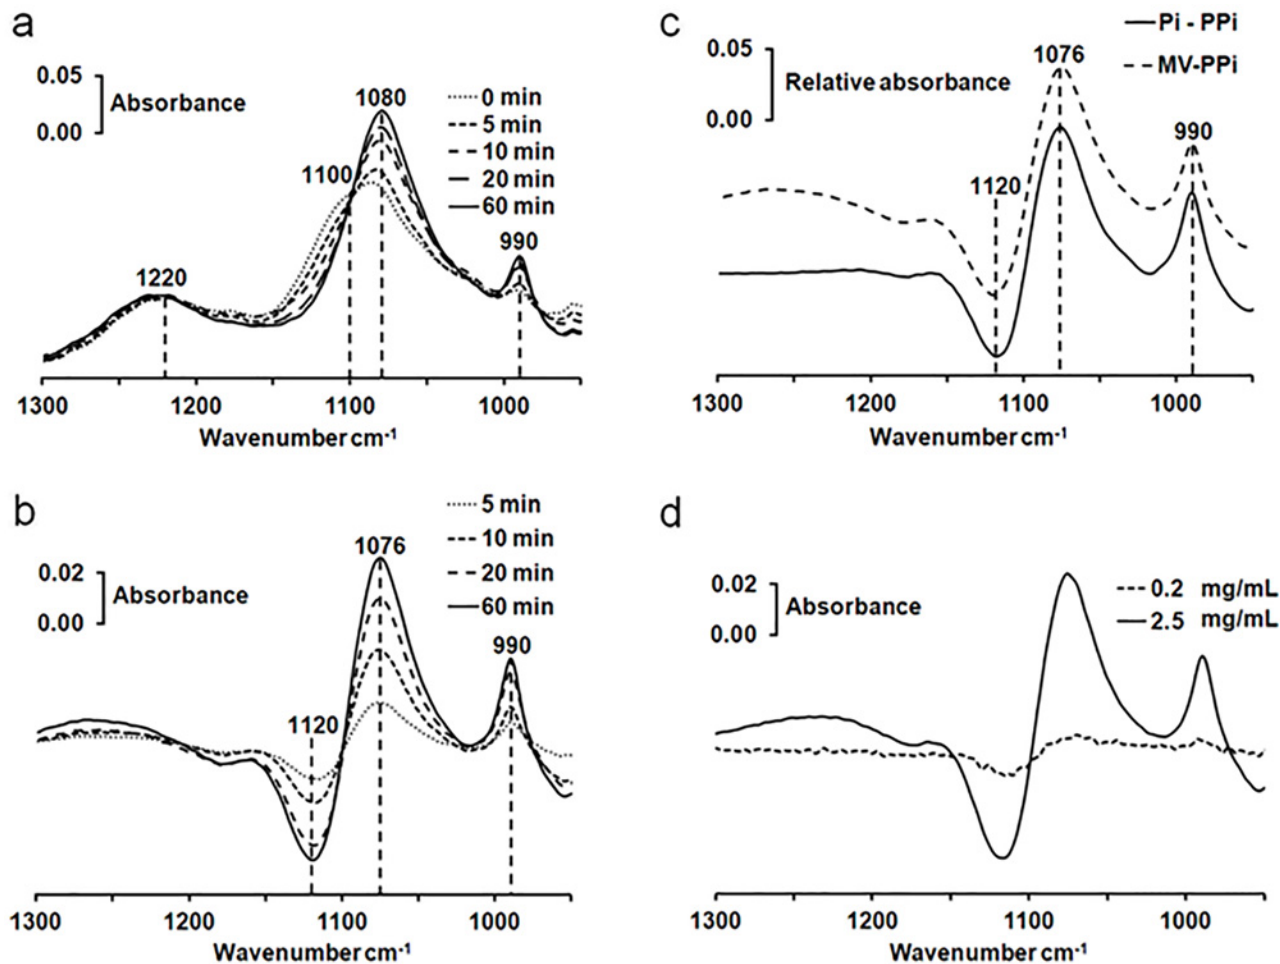

**Fig 7. Phosphatase activity in matrix vesicles as determined by infrared spectroscopy.** (a) Kinetic recording of 50 mM  $PP_i$  hydrolysis by 2 mg MV protein  $mL^{-1}$  in buffer A at 37°C. Successive infrared spectra were measured at the indicated times. (b) Difference IR spectra of MVs with  $PP_i$  (spectrum recorded at the indicated time minus that recorded immediately). Significant variation in the intensity of absorption bands of  $PP_i$  located at 1120–1100  $cm^{-1}$  as well as other variations attributed to  $P_i$  at 1076–1080  $cm^{-1}$  and 990  $cm^{-1}$  were observed. (c) Expected IR difference spectrum of product and substrate ( $2xP_i$  minus  $PP_i$ ) (dashed line). IR difference spectrum of the hydrolysis of 50 mM  $PP_i$  by 2.5 mg MV protein  $mL^{-1}$  in buffer A (spectrum recorded at 60 min minus spectrum recorded immediately) (Full line) (d) Sensitivity of the infrared assay to determine the hydrolysis of 50 mM  $PP_i$  by 2.5 mg MV protein  $mL^{-1}$  (full line) and by 0.2 mg MV protein  $mL^{-1}$  (dashed line) as shown by their difference spectrum respectively (spectrum of MVs with 50 mM  $PP_i$  recorded at 30 min minus spectrum recorded immediately).

doi:10.1371/journal.pone.0120087.g007

if the pyrophosphatase activity originates from TNAP-enriched cells, levamisole (a TNAP inhibitor) was added to the medium. At the concentration of 5 mM, levamisole almost completely inhibited the  $PP_i$  hydrolysis by Saos-2 cells (Fig. 6d), suggesting that TNAP contributed mostly to the  $PP_i$  hydrolysis of Saos-2 cells. Relative activity instead of specific activity was used to take into account of cell variability. 100% corresponded to the specific activity without the addition of inhibitor. An  $IC_{50}$  value of  $1.16 \pm 0.03$  mM was obtained for the inhibition of phosphatase activity of levamisole which is comparable with the reported concentration of 1 mM levamisole that blocked calcification in cultures of aortas from uremic rats [37].

### Determination of specific activity of phosphatase in matrix vesicles

Matrix vesicles (MVs) extracted from growth plates and epiphyseal cartilage of 17-day-chicken embryos were also assayed for  $PP_i$  hydrolysis since they have 10–40 fold higher TNAP specific

activity than cells. MV size is around 100–400 nm diameter as determined by electron microscope [38]. Typical example of a series of IR spectra during  $PP_i$  hydrolysis of MVs in Buffer A supplemented with 50 mM  $PP_i$  monitored at 37°C are shown in Fig. 7a.

The intensity decrease of the 1120–1100  $cm^{-1}$  band related to the disappearance of  $PP_i$  is correlated with the increase in the 1076–1080 and 990  $cm^{-1}$  bands (Fig. 7a), indicating a hydrolysis of  $PP_i$  by MVs and an appearance of  $P_i$ . It is better seen in the difference infrared spectra, e.g. from the IR spectrum of MVs recorded at the indicated time minus that recorded immediately (Fig. 7b), which were similar with difference spectra of Saos-2 cells with  $PP_i$  (Fig. 3) and also with those of alkaline phosphatase with  $PP_i$  (data not shown). The calculated IR difference, i.e. spectrum of  $P_i$  minus spectrum of  $PP_i$  (Fig. 7c, dashed line) is almost identical to the IR difference spectrum of MVs with  $PP_i$  (spectrum recorded after 60 min minus the spectrum

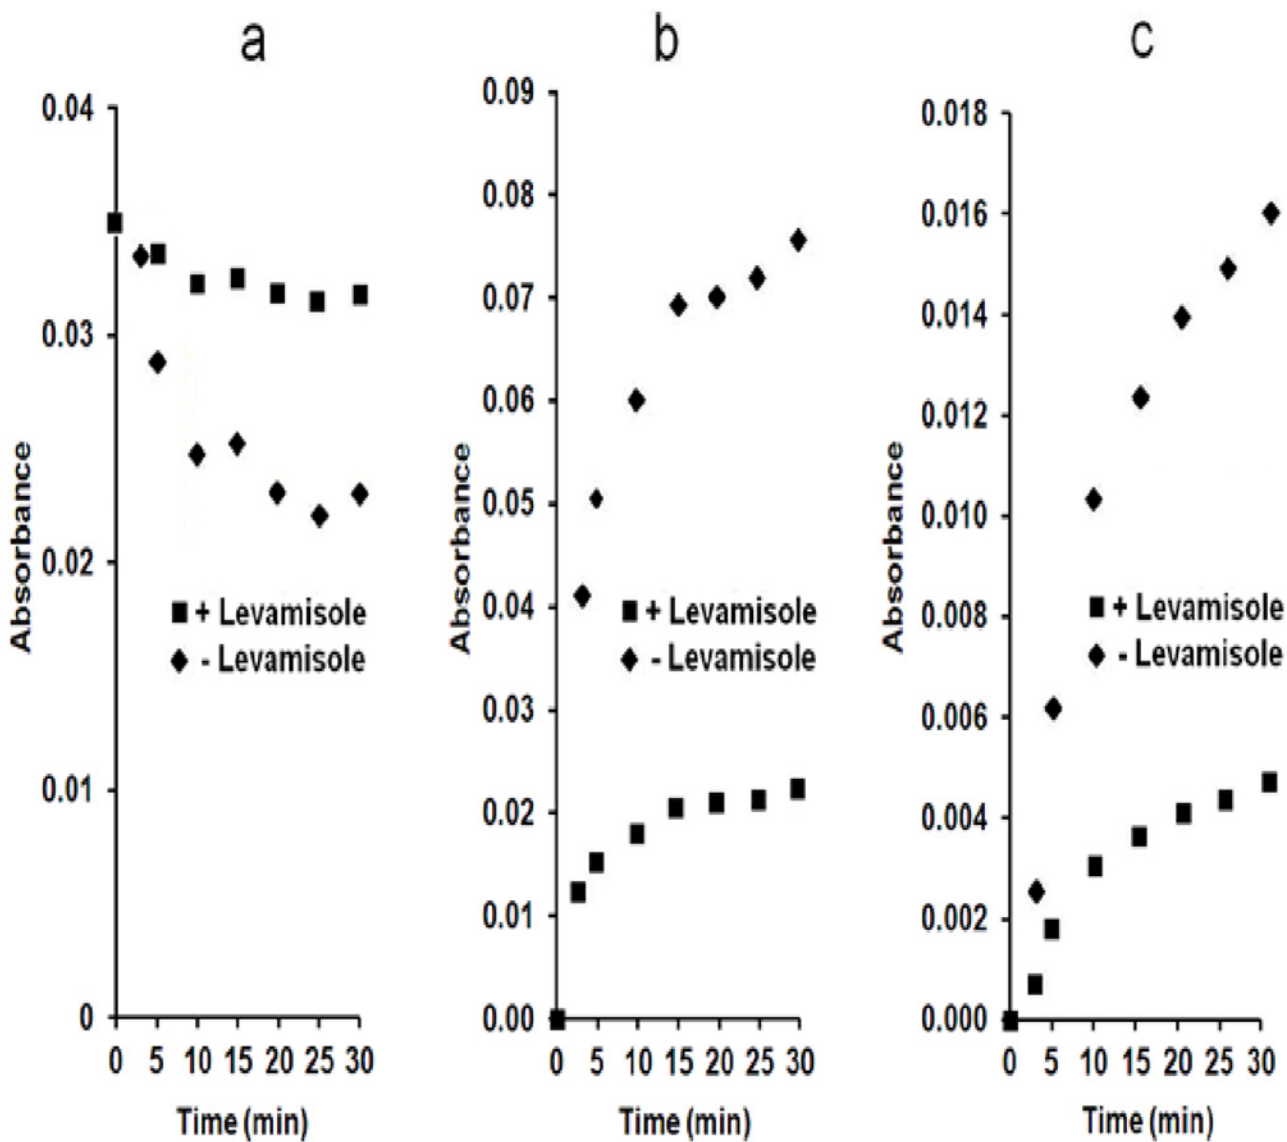

**Fig 8. Inhibition of pyrophosphatase activity in matrix vesicles by levamisole.** (a) Absorption changes of  $PP_i$  band at 1107  $cm^{-1}$ ; (b) Absorption changes of  $P_i$  peak at 990  $cm^{-1}$ ; (c) Absorption changes of  $P_i$  band at 1076  $cm^{-1}$  during  $PP_i$  hydrolysis by 2  $mg\ mL^{-1}$  MVs in buffer A at 37°C in the absence (♦) or presence (■) of 5 mM levamisole.

doi:10.1371/journal.pone.0120087.g008

recorded immediately) (Fig. 7c, full line). The IR changes produced by  $PP_i$  hydrolysis by MVs corresponded to the calculated decrease of one  $PP_i$  and to the formation of two  $P_i$ . We estimated the sensitivity of the IR assay during 30-min incubation to be about  $0.2 \text{ mg mL}^{-1}$  MV protein. At  $0.2 \text{ mg mL}^{-1}$  MV protein, only faint bands not much more intensive than the noise signal are detected (Fig. 7d, dashed line), while at  $2.5 \text{ mg mL}^{-1}$  MV protein, the IR bands indicating disappearance of  $PP_i$  and appearance of  $P_i$  are well resolved (Fig. 7d, full line). Activity measurements were determined by measuring absorbance changes of the absorbance changes of  $PP_i$  band located at  $1107 \text{ cm}^{-1}$  using  $\epsilon = 2158 \pm 211 \text{ M}^{-1} \text{ cm}^{-1}$  (Fig. 8a) as well as with two  $P_i$  bands located at  $990 \text{ cm}^{-1}$  (Fig. 8b) and  $1076 \text{ cm}^{-1}$  (Fig. 8c), using  $\epsilon = 443 \pm 50 \text{ M}^{-1} \text{ cm}^{-1}$  and  $\epsilon = 1215 \pm 131 \text{ M}^{-1} \text{ cm}^{-1}$ , respectively. As a result we determined an apparent hydrolytic activity of MVs towards  $PP_i$  of  $1132 \pm 370 \text{ nmol min}^{-1} \text{ mg}^{-1}$ .

For comparison, the TNAP activity of MVs determined at pH 10.4 using the  $pNPP$  as a substrate, amounted to  $30\,000 \pm 10\,000 \text{ nmol min}^{-1} \text{ mg}^{-1}$ . This is consistent with the reported values for alkaline phosphatase extracted from HeLa cells, having a  $PP_i$  hydrolytic activity at pH 8.5 about 26 to 30 times smaller than the  $pNPP$  hydrolytic activity at pH 10.5 [36]. To test if the hydrolysis of  $PP_i$  is specifically associated to TNAP, we incubated the reactive medium containing MVs and  $50 \text{ mM } PP_i$  with  $5 \text{ mM}$  levamisole, a TNAP specific inhibitor. Addition of levamisole induced a smaller slope in the absorbance changes at  $1107 \text{ cm}^{-1}$  (Fig. 8a), at  $990 \text{ cm}^{-1}$  (Fig. 8b) and at  $1076 \text{ cm}^{-1}$  (Fig. 8c) as compared with the control sample without levamisole (Fig. 8). We observed a significant inhibition of  $PP_i$  hydrolysis in the presence of  $5 \text{ mM}$  levamisole from  $1132 \pm 370 \text{ nmol min}^{-1} \text{ mg}^{-1}$  (without levamisole) to  $343 \pm 112 \text{ nmol min}^{-1} \text{ mg}^{-1}$  (with  $5 \text{ mM}$  Levamisole) confirming that TNAP is to a large extent responsible for  $PP_i$  hydrolysis. Since the levamisole could not block completely the phosphatase activity, there is the possibility that other phosphatases such as NPP1 can catalyze the phosphatase activity. Indeed, NPP1, which usually hydrolyses phosphodiester bond can also hydrolyze phosphomonoester bond at a lesser extend [39].

## Conclusion

It has been recognized earlier that IR spectroscopy has considerable potential as a tool in diagnostics since it may be used to assess biochemical changes of cells exposed to various inhibitors [20–28]. Here we demonstrated the ability of IR spectroscopy to directly determine *in situ* a phosphatase activity in osteoblasts using natural substrates without any labeling. We showed the ability of IR spectroscopy to directly determine simultaneously protein concentration and the phosphatase activity in cultured osteoblasts as well as in matrix vesicles using physiological substrates such as AMP, ADP, ATP, UTP, and  $PP_i$ . The method has been validated for osteoblasts (Saos-2 cells and primary osteoblasts) and chondrocyte-derived matrix vesicles which are all TNAP enriched. This approach could be extended to determine alkaline phosphatase activity as well as any type of phosphatase activity in other cells. It may serve as a metabolomic tool to determine an overall phosphatase activity in a cell which may involve several enzymes.

## Author Contributions

Conceived and designed the experiments: GB LDD RB S. Mebarek ZR. Performed the experiments: GB NK LDD SA S. Meena S. Mebarek RB ZR. Analyzed the data: DM LDD RB S. Mebarek SP YW. Contributed reagents/materials/analysis tools: GB LDD NK SA SM S. Mebarek ZR. Wrote the paper: DM LDD RB S. Mebarek YW ZR.



## References

1. Buchet R, Millán JL, Magne D. Multisystemic functions of alkaline phosphatases. *Methods Mol Biol.* 2013; 1053: 27–51. doi: [10.1007/978-1-62703-562-0\\_3](https://doi.org/10.1007/978-1-62703-562-0_3) PMID: [23860646](https://pubmed.ncbi.nlm.nih.gov/23860646/)
2. Dahl R, Sergienko EA, Su Y, Mostofi YS, Yang L, Simao AM, et al. Discovery and validation of a series of aryl sulfonamides as selective inhibitors of tissue-nonspecific alkaline phosphatase (TNAP). *J Med Chem.* 2009; 52: 6919–6925. doi: [10.1021/jm900383s](https://doi.org/10.1021/jm900383s) PMID: [19821572](https://pubmed.ncbi.nlm.nih.gov/19821572/)
3. Sergienko EA, Millán JL. High-throughput screening of tissue-nonspecific alkaline phosphatase for identification of effectors with diverse modes of action. *Nat Protoc.* 2010; 8: 1431–1439. doi: [10.1038/nprot.2010.86](https://doi.org/10.1038/nprot.2010.86) PMID: [20671726](https://pubmed.ncbi.nlm.nih.gov/20671726/)
4. Bleicher KH, Böhm HJ, Müller K, Alanine AI. Hit and lead generation: beyond high-throughput screening. *Nat Rev Drug Discov.* 2003; 2: 369–378. PMID: [12750740](https://pubmed.ncbi.nlm.nih.gov/12750740/)
5. Barth A, Zscherp CQ. What vibrations tell us about proteins. *Rev Biophys.* 2002; 35: 369–430 PMID: [12621861](https://pubmed.ncbi.nlm.nih.gov/12621861/)
6. Naumann D, Helm D, Labischinski H. Microbiological characterizations by FT-IR spectroscopy. *Nature.* 1991; 351: 81–82. PMID: [1902911](https://pubmed.ncbi.nlm.nih.gov/1902911/)
7. Bosch A, Prieto C, Serra DO, Martina P, Stämmbler M, Naumann D, et al. Type-IV pili spectroscopic markers: applications in the quantification of piliation levels in *Moraxella bovis* cells by a FT-IR ANN-based model. *J Biophotonics.* 2010; 8–9: 522–533.
8. Helm D, Labischinski H, Schallehn G, Naumann DJ. Classification and identification of bacteria by Fourier transform infrared spectroscopy. *J Gen Microbiol.* 1991; 137: 69–79. PMID: [1710644](https://pubmed.ncbi.nlm.nih.gov/1710644/)
9. Rebuffo C, Schmitt J, Wenning M, von Stetten F, Scherer S. Reliable and rapid identification of *Listeria monocytogenes* and *Listeria* species by artificial neural network-based Fourier transform infrared spectroscopy. *Appl Environ Microbiol.* 2006; 72: 994–1000. PMID: [16461640](https://pubmed.ncbi.nlm.nih.gov/16461640/)
10. Bosch A, Minan A, Vescina C, Schmitt J, Degrossi J, Gatti B, et al. Fourier transform infrared spectroscopy for rapid identification of nonfermenting gram-negative bacteria isolated from sputum samples from cystic fibrosis patients. *J Clin Microbiol.* 2008; 46: 2535–2546. doi: [10.1128/JCM.02267-07](https://doi.org/10.1128/JCM.02267-07) PMID: [18550747](https://pubmed.ncbi.nlm.nih.gov/18550747/)
11. Harvey TJ, Henderson A, Gazi E, Clarke NW, Brown M, Faria EC, et al. Discrimination of prostate cancer cells by reflection mode FTIR photoacoustic spectroscopy. *Analyst.* 2007; 132: 292–295. PMID: [17554407](https://pubmed.ncbi.nlm.nih.gov/17554407/)
12. Bhargava R. Towards a practical Fourier transform infrared chemical imaging protocol for cancer histopathology. *Anal Bioanal Chem.* 2007; 389: 1155–1169. PMID: [17786414](https://pubmed.ncbi.nlm.nih.gov/17786414/)
13. Holton SE, Walsh MJ, Bhargava R. Subcellular localization of early biochemical transformations in cancer-activated fibroblasts using infrared spectroscopic imaging. *Analyst* 2011; 136: 2953–2958. doi: [10.1039/c1an15112f](https://doi.org/10.1039/c1an15112f) PMID: [21647505](https://pubmed.ncbi.nlm.nih.gov/21647505/)
14. Benard A, Desmedt C, Smolina M, Szternfeld P, Verdonck M, Rouas G, et al. Infrared imaging in breast cancer: automated tissue component recognition and spectral characterization of breast cancer cells as well as the tumor microenvironment. *Analyst.* 2014; 139: 1044–1056. doi: [10.1039/c3an01454a](https://doi.org/10.1039/c3an01454a) PMID: [24418921](https://pubmed.ncbi.nlm.nih.gov/24418921/)
15. Derenne A, Vandersleyen O, Goormaghtigh E. Lipid quantification method using FTIR spectroscopy applied on cancer cell extracts. *Biochim Biophys Acta.* 2014; 1841: 1200–1209. doi: [10.1016/j.bbali.2013.10.010](https://doi.org/10.1016/j.bbali.2013.10.010) PMID: [24157469](https://pubmed.ncbi.nlm.nih.gov/24157469/)
16. Kumar S, Desmedt C, Larsimont D, Sotiriou C, Goormaghtigh E. Change in the microenvironment of breast cancer studied by FTIR imaging. *Analyst.* 2013; 138: 4070–4075. doi: [10.1039/c3an00193h](https://doi.org/10.1039/c3an00193h) PMID: [23675579](https://pubmed.ncbi.nlm.nih.gov/23675579/)
17. Holton SE, Bergamaschi A, Katzenellenbogen BS, Bhargava R. Integration of molecular profiling and chemical imaging to elucidate fibroblast-microenvironment impact on cancer cell phenotype and endocrine resistance in breast cancer. *PLOS One.* 2014; 9(5): e96878. doi: [10.1371/journal.pone.0096878](https://doi.org/10.1371/journal.pone.0096878) PMID: [24816718](https://pubmed.ncbi.nlm.nih.gov/24816718/)
18. Diem M, Romeo M, Boydston-White S, Miljkovic M, Matthäus C. A decade of vibrational micro-spectroscopy of human cells and tissue (1994–2004). *Analyst.* 2004; 129: 880–885. PMID: [15457314](https://pubmed.ncbi.nlm.nih.gov/15457314/)
19. Pereira TM, Zezell DM, Bird B, Miljković M, Diem M. The characterization of normal thyroid tissue by micro-FTIR spectroscopy. *Analyst.* 2013; 138: 7094–7100. doi: [10.1039/c3an00296a](https://doi.org/10.1039/c3an00296a) PMID: [24137615](https://pubmed.ncbi.nlm.nih.gov/24137615/)
20. Krishna CM, Kegelaerl G, Adt I, Rubin S, Kartha VB, Manfait M, et al. Combined Fourier transform infrared and Raman spectroscopic identification approach for identification of multidrug resistance phenotype in cancer cell lines. *Biopolymers.* 2006; 82: 462–470. PMID: [16493658](https://pubmed.ncbi.nlm.nih.gov/16493658/)

21. Matthäus C, Bird B, Miljkovic M, Chernenko T, Romeo M, Diem M. Infrared and Raman Microscopy in Cell Biology Methods Cell Biol. 2008; 89: 275–308. doi: [10.1016/S0091-679X\(08\)00610-9](https://doi.org/10.1016/S0091-679X(08)00610-9) PMID: [19118679](https://pubmed.ncbi.nlm.nih.gov/19118679/)
22. Zwielly A, Gopas J, Brkic G, Mordechai S. Discrimination between drug-resistant and non-resistant human melanoma cell lines by FTIR spectroscopy. Analyst 2009; 134: 294–300. doi: [10.1039/b805223a](https://doi.org/10.1039/b805223a) PMID: [19173052](https://pubmed.ncbi.nlm.nih.gov/19173052/)
23. Gasper R, Dewelle J, Kiss R, Mijatovic T, Goormaghtigh E. IR spectroscopy as a new tool for evidencing antitumor drug signatures. Biochim Biophys Acta. 2009; 1788: 1263–1270. doi: [10.1016/j.bbamem.2009.02.016](https://doi.org/10.1016/j.bbamem.2009.02.016) PMID: [19250921](https://pubmed.ncbi.nlm.nih.gov/19250921/)
24. Diem M, Papamarkakis K, Schubert J, Bird B, Romeo MJ, Miljković M. The infrared spectral signatures of disease: extracting the distinguishing spectral features between normal and diseased states. Appl Spectrosc. 2009; 63: 307A–318A. doi: [10.1366/000370209789806894](https://doi.org/10.1366/000370209789806894) PMID: [19891826](https://pubmed.ncbi.nlm.nih.gov/19891826/)
25. Vilen B, Jeney S, Sienkiewicz A, Marcoux P, Miller L, Forro L. Evidence of lipid prooxidation and protein phosphorylation in cells upon oxidative stress photo-generated by fullerols. Biophys Chem. 2010; 152: 164–169. doi: [10.1016/j.bpc.2010.09.004](https://doi.org/10.1016/j.bpc.2010.09.004) PMID: [20970241](https://pubmed.ncbi.nlm.nih.gov/20970241/)
26. Gasper R, Mijatovic T, Bénard A, Derenne A, Kiss R, Goormaghtigh E. FTIR spectral signature of the effect of cardiotoxic steroids with antitumoral properties on a prostate cancer cell line. Biochim Biophys Acta. 2010; 1802: 1087–1094. doi: [10.1016/j.bbadis.2010.07.012](https://doi.org/10.1016/j.bbadis.2010.07.012) PMID: [20656024](https://pubmed.ncbi.nlm.nih.gov/20656024/)
27. Flower K, Khalifa I, Bassan P, Démoulin D, Jackson E, Lockyer N, et al. Synchrotron FTIR analysis of drug treated ovarian A2780 cells: an ability to differentiate cell response to different drugs? Analyst. 2010; 136: 498–507. doi: [10.1039/c0an00564a](https://doi.org/10.1039/c0an00564a) PMID: [21088767](https://pubmed.ncbi.nlm.nih.gov/21088767/)
28. Gasper R, Vandenbussche G, Goormaghtigh E. Ouabain induced modifications of prostate cancer cell lipidome investigated with mass spectrometry and FTIR spectroscopy. Biochim Biophys Acta. 2011; 1808: 597–560. doi: [10.1016/j.bbamem.2010.11.033](https://doi.org/10.1016/j.bbamem.2010.11.033) PMID: [21144819](https://pubmed.ncbi.nlm.nih.gov/21144819/)
29. Lendl B, Krieg P, Kellner R. Determination of alkaline phosphatase activity in human sera by mid-FTIR spectroscopy. Fresenius J Anal Chem. 1998; 360: 717–720.
30. Wu LN, Yoshimori T, Genge BR, Sauer GR, Kirsch T, Ishikawa Y, et al. Characterization of the nucleational core complex responsible for mineral induction by growth plate cartilage matrix vesicles. J Biol Chem. 1993; 268: 25084–25094. PMID: [8227072](https://pubmed.ncbi.nlm.nih.gov/8227072/)
31. Bradford MM. A rapid and sensitive method for the quantitation of microgram quantities of protein utilizing the principle of protein-dye binding. Anal Biochem. 1976; 72: 248–254. PMID: [942051](https://pubmed.ncbi.nlm.nih.gov/942051/)
32. Tsuboi M. Vibrational spectra of phosphite and hypophosphite anions and the 24 characteristic frequencies of PO<sub>3</sub>—and PO<sub>2</sub>—groups. J Am Chem Soc. 1957; 79: 1351–1354.
33. Wang JW, Xiao DG, Deng H, Webb MR, Callender R. Raman difference studies of GDP and GTP binding to c-Harvey ras. Biochemistry. 1998; 37: 11106–11116. PMID: [9693007](https://pubmed.ncbi.nlm.nih.gov/9693007/)
34. Yamamoto I, Konto A, Handa T, Miyajima K. Regulation of phospholipase D activity by neutral lipids in egg-yolk phosphatidylcholine small unilamellar vesicles and by calcium ion in aqueous medium. Biochim Biophys Acta. 1995; 1233: 21–6. PMID: [7833345](https://pubmed.ncbi.nlm.nih.gov/7833345/)
35. Do le D, Buchet R, Pikula S, Abousalham A, Mebarek S. Direct determination of phospholipase D activity by infrared spectroscopy. Anal Biochem. 2012; 430: 32–8. doi: [10.1016/j.ab.2012.07.017](https://doi.org/10.1016/j.ab.2012.07.017) PMID: [22842398](https://pubmed.ncbi.nlm.nih.gov/22842398/)
36. Cox RP, Gilbert P Jr, Griffin MJ. Alkaline Inorganic Pyrophosphatase Activity of Mammalian-Cell Alkaline Phosphatase. Biochem J. 1967; 105: 155–161. PMID: [4964763](https://pubmed.ncbi.nlm.nih.gov/4964763/)
37. Lomashvili KA, Garg P, Narisawa S, Millan JL, O'Neill WC. Upregulation of alkaline phosphatase and pyrophosphate hydrolysis: potential mechanism for uremic vascular calcification. Kidney Int. 2008; 73: 1024–1030. doi: [10.1038/ki.2008.26](https://doi.org/10.1038/ki.2008.26) PMID: [18288101](https://pubmed.ncbi.nlm.nih.gov/18288101/)
38. Thouverey C, Malinowska A, Balcerzak M, Strzelecka-Kiliszek A, Buchet R, Dadlez M, et al. Proteomic characterization of biogenesis and functions of matrix vesicles released from mineralizing human osteoblast-like cells. Journal of Proteomics. 2011; 74: 1123–1134. doi: [10.1016/j.jprot.2011.04.005](https://doi.org/10.1016/j.jprot.2011.04.005) PMID: [21515422](https://pubmed.ncbi.nlm.nih.gov/21515422/)
39. Zalatan JG, Fenn TD, Brunger AT, Herschlag D. Structural and functional comparisons of nucleotide pyrophosphatase/phosphodiesterase and alkaline phosphatase: implications for mechanism and evolution. Biochemistry. 2006; 45: 9788–9803. PMID: [16893180](https://pubmed.ncbi.nlm.nih.gov/16893180/)
